# Supplementary material for: In Vivo Expression of the PTB-deleted Odin Mutant Results in Hydrocephalus
Source: PubMed Central journal article supplement — Mol Cells. 2015 May 15;38(5):426–31. doi: 10.14348/molcells.2015.2288 (PMC4443284; doi:10.14348/molcells.2015.2288), 2015-05-15

Supplementary Figure 1. GFP expression analysis of brain from transgenic mice at P5. Littermate mice at P5 were obtained from a cross between the Odin-dPTB BAC transgenic line and *wnt1-Cre* mice and then GFP fluorescent image of the mid-sagittal section was analyzed for the indicated brains. Note that GFP was disappeared in the SCO and ependymal cells of the midbrain from the double transgenic mice (C and D).

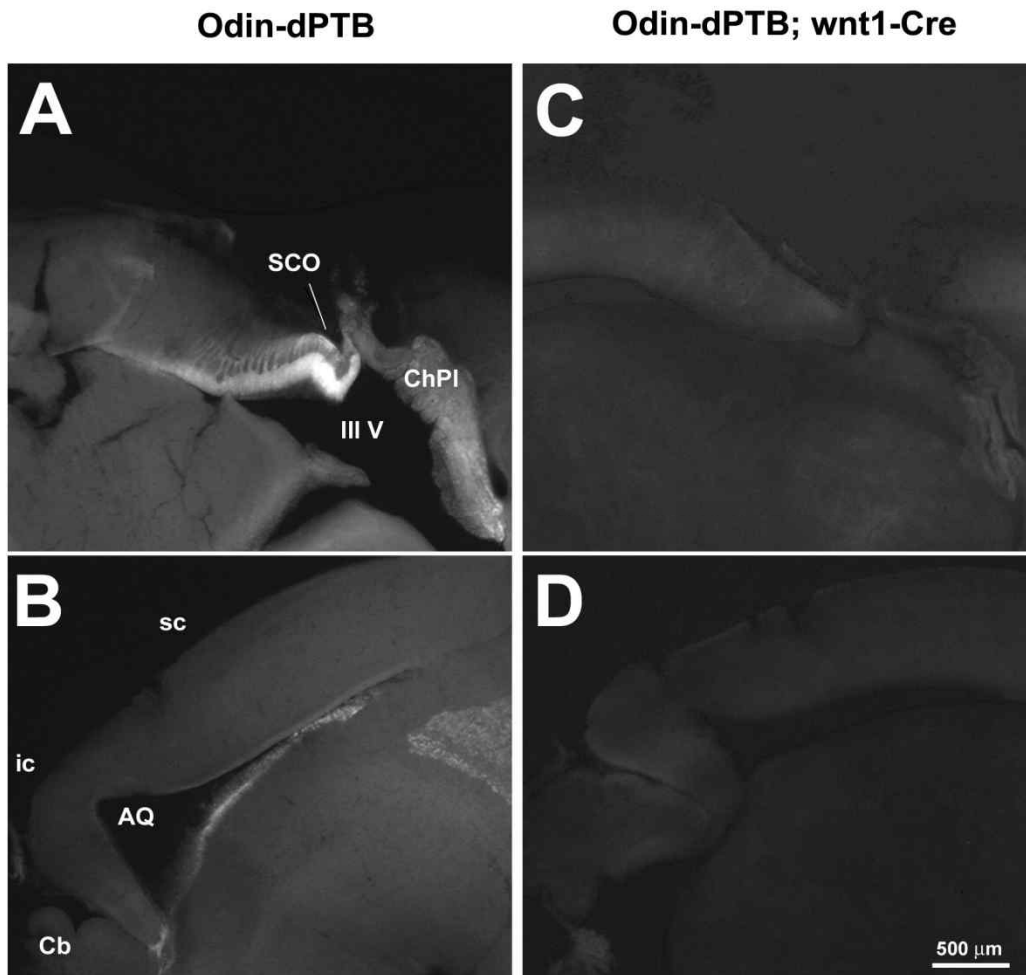

Supplementary Figure 2. The ependymal cells lining the cerebral aqueduct of double transgenic mice are defective for the expression of S100 $\beta$ . Littermate mice at P5 were obtained from a cross between the Odin-dPTB BAC transgenic line and *wnt1*-Cre mice and then the mid-sagittal section of the indicated mice was subjected to immunohistochemical staining using anti-S100 $\beta$  antibody (green) to reveal mature ependymal cells.

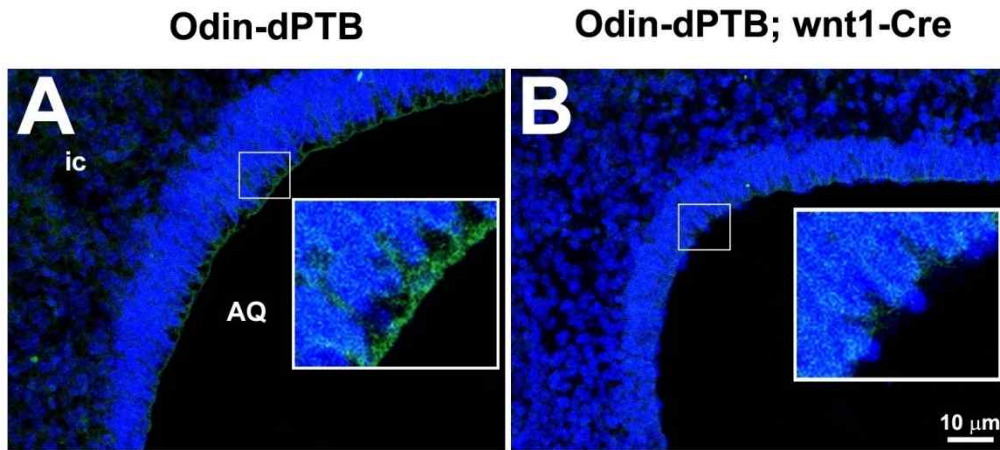

Supplement: molce-38-5-426-supplementary.pdf [file molce-38-5-426-supplementary.pdf]
